# Supplementary material for: Prophage Carriage and Genetic Diversity within Environmental Isolates of Clostridioides difficile
Source: MDPI journal article supplement (doi:10.3390/ijms25010002), 2023-12-19
Supplement: s1 [file s1]

**Table S5.** Cas systems in identified prophage genomes of environmental *C. difficile* isolates.

| Strain name                | Region/CRISP<br>R ID | Completeness /<br>prophage type | Cas-<br>type/subtype | Gene<br>status | System           | Start | End   | Strand |
|----------------------------|----------------------|---------------------------------|----------------------|----------------|------------------|-------|-------|--------|
| <i>C. difficile</i> RSS39  | 2_2                  | Incomplete                      | cas3a_TypeI          | Forbidden      | CAS              | 842   | 1414  | +      |
| <i>C. difficile</i> CF76   | 1_35                 | Questionable                    | cas3a_TypeI          | Forbidden      | CAS              | 23934 | 24875 | -      |
| <i>C. difficile</i> RS147  | 7_20                 | Incomplete                      | cas3a_TypeI          | Forbidden      | CAS              | 18067 | 18067 | -      |
| <i>C. difficile</i> RS150  | 3_20                 | Incomplete                      | cas3a_TypeI          | Forbidden      | CAS              | 18067 | 18067 | -      |
| <i>C. difficile</i> ARC182 | 8_44                 | Intact<br>(phiCDHM14)           | csm2_TypeIIIA        | Mandatory      | CAS-<br>TypeIIIA | 27400 | 27660 | -      |
